# Supplementary material for: The yeast integral membrane protein Apq12 potentially links membrane dynamics to assembly of nuclear pore complexes
Source: PubMed Central journal article supplement — J Cell Biol. 2007 Aug 27;178(5):799–812. doi: 10.1083/jcb.200702120 (PMC2064545; doi:10.1083/jcb.200702120), 2007-08-27
Supplement: jcellbiol_jcb.200702120_5.pdf [file jcellbiol_jcb.200702120_5.pdf]

Table S1. Strains and plasmids used in this study

| Name              | Relevant genotype                                                               | Source                  |
|-------------------|---------------------------------------------------------------------------------|-------------------------|
| Strains           |                                                                                 |                         |
| <i>APQ12-GFP</i>  | <i>MATa his3 ura3Δ0 leu2Δ0 met15Δ0 APQ12-GFP</i>                                | Invitrogen              |
| <i>apq12Δ, a</i>  | <i>MATa his3 ura3Δ0 leu2Δ0 met15Δ0 apq12::KAN<sup>R</sup></i>                   | EUROSCARF               |
| <i>apq12Δ, α</i>  | <i>MATa his3 ura3Δ0 leu2Δ0 lys2 apq12::KAN<sup>R</sup></i>                      | Research Genetics       |
| <i>nup188Δ</i>    | <i>MATa his3 ura3Δ0 leu2Δ0 lys2 nup188::KAN<sup>R</sup></i>                     | Research Genetics       |
| <i>nup170Δ</i>    | <i>MATa his3 ura3Δ0 leu2Δ0 lys2 nup170::KAN<sup>R</sup></i>                     | Research Genetics       |
| <i>pom152Δ</i>    | <i>MATa his3 ura3Δ0 leu2Δ0 lys2 pom152::KAN<sup>R</sup></i>                     | Research Genetics       |
| <i>JSy064</i>     | <i>his3 ura3Δ0 leu2Δ0 pom152::KAN<sup>R</sup> apq12::KAN<sup>R</sup></i>        | This study              |
| <i>pom34Δ</i>     | <i>MATa his3 ura3Δ0 leu2Δ0 lys2 pom34::KAN<sup>R</sup></i>                      | Research Genetics       |
| <i>JSy058</i>     | <i>his3 ura3Δ0 leu2Δ0 pom34::KAN<sup>R</sup> apq12::KAN<sup>R</sup></i>         | This study              |
| <i>nup60Δ</i>     | <i>MATa his3 ura3Δ0 leu2Δ0 lys2 nup60::KAN<sup>R</sup></i>                      | Research Genetics       |
| <i>JSy063</i>     | <i>his3 ura3Δ0 leu2Δ0 nup60::KAN<sup>R</sup> apq12::KAN<sup>R</sup></i>         | This study              |
| <i>nup2Δ</i>      | <i>MATa his3 ura3Δ0 leu2Δ0 lys2 nup2::KAN<sup>R</sup></i>                       | Research Genetics       |
| <i>JSy062</i>     | <i>his3 ura3Δ0 leu2Δ0 nup2::KAN<sup>R</sup> apq12::KAN<sup>R</sup></i>          | This study              |
| <i>nup100Δ</i>    | <i>MATa his3 ura3Δ0 leu2Δ0 lys2 nup100::KAN<sup>R</sup></i>                     | Research Genetics       |
| <i>JSy051</i>     | <i>ura3Δ0 leu2Δ0 nup100::KAN<sup>R</sup> apq12::KAN<sup>R</sup></i>             | This study              |
| <i>CHY255</i>     | <i>MATa his3 ura3Δ0 leu2Δ0 lys2 rat8-2::NAT<sup>R</sup></i>                     | This study              |
| <i>CDy3</i>       | <i>his3 ura3Δ0 leu2Δ0 rat8-2::NAT<sup>R</sup> apq12::KAN<sup>R</sup></i>        | This study              |
| <i>mex67-5</i>    | <i>MATa his3 lys2 leu2Δ0 ura3Δ0 mex67-5::NAT<sup>R</sup></i>                    | This study              |
| <i>CHy245</i>     | <i>MATa rat7ΔN ura3-52 leu2Δ1 his3Δ200 trp1Δ63</i>                              | This study              |
| <i>CDy4</i>       | <i>ura3 leu2 his3 rat7ΔN apq12::KAN<sup>R</sup></i>                             | This study              |
| <i>SPY23</i>      | <i>MATa trp1Δ63 ura3-52 leu2Δ1 gle1-37</i>                                      | Hodge et al., 1999      |
| <i>CHy119</i>     | <i>MATa ura3-52 leu2Δ1 rip1::HIS3</i>                                           | Saavedra et al., 1997   |
| <i>CHy108</i>     | <i>MATa ura3-52 leu2Δ1 trp1Δ63 nup120::HIS3</i>                                 | Heath et al., 1995      |
| <i>AGy916</i>     | <i>MATa ura3-52 leu2Δ1 trp1Δ63 nup85::HIS3</i>                                  | Goldstein et al., 1996  |
| <i>JSy052</i>     | <i>ura3 leu2 nup85Δ::HIS3 apq12::KAN<sup>R</sup></i>                            | This study              |
| <i>JSy059</i>     | <i>his3 ura3Δ0 leu2Δ0 nup188::KAN<sup>R</sup> apq12::KAN<sup>R</sup></i>        | This study              |
| <i>JSy061</i>     | <i>his3 ura3Δ0 leu2Δ0 nup170::KAN<sup>R</sup> apq12::KAN<sup>R</sup></i>        | This study              |
| <i>JSy049</i>     | <i>his3 ura3Δ0 leu2Δ0 NIC96-mRFP::HIS3 apq12::KAN<sup>R</sup></i>               | This study              |
| <i>NIC96-mRFP</i> | <i>MATa his3 ura3Δ0 leu2Δ0 NIC96-mRFP::HIS3</i>                                 | J. Falvo <sup>a</sup>   |
| <i>NUP82-GFP</i>  | <i>MATa his3 ura3Δ0 leu2Δ0 NUP82-GFP::HIS3</i>                                  | Invitrogen              |
| <i>JSy050</i>     | <i>his3 ura3Δ0 leu2Δ0 NUP82-GFP::HIS3 apq12::KAN<sup>R</sup></i>                | This study              |
| <i>JSy054</i>     | <i>MATa his3Δ200 ura3-52 leu2Δ1 GFP-NUP49::URA3</i>                             | This study              |
| <i>JSy055</i>     | <i>MATa his3 ura3Δ0 leu2Δ0 met15Δ0 apq12::KAN<sup>R</sup> GFP-NUP49::URA3</i>   | This study              |
| <i>NUP1-GFP</i>   | <i>MATa his3Δ1 ura3Δ0 leu2Δ0 met15Δ0 NUP1-GFP::HIS3</i>                         | Invitrogen              |
| <i>NUP60-GFP</i>  | <i>MATa his3Δ1 ura3Δ0 leu2Δ0 met15Δ0 NUP60-GFP::HIS3</i>                        | Invitrogen              |
| <i>NUP170-GFP</i> | <i>MATa his3Δ1 ura3Δ0 leu2Δ0 met15Δ0 NUP170-GFP::HIS3</i>                       | Invitrogen              |
| <i>NUP188-GFP</i> | <i>MATa his3Δ1 ura3Δ0 leu2Δ0 met15Δ0 NUP188-GFP::HIS3</i>                       | Invitrogen              |
| <i>NSP1-GFP</i>   | <i>MATa his3Δ1 ura3Δ0 leu2Δ0 met15Δ0 NSP1-GFP::HIS3</i>                         | Invitrogen              |
| <i>MLP1-GFP</i>   | <i>MATa his3Δ1 ura3Δ0 leu2Δ0 met15Δ0 MLP1-GFP::HIS3</i>                         | Invitrogen              |
| <i>SAC3-GFP</i>   | <i>MATa his3Δ1 ura3Δ0 leu2Δ0 met15Δ0 SAC3-GFP::HIS3</i>                         | Invitrogen              |
| <i>NUP57-GFP</i>  | <i>MATa his3Δ1 ura3Δ0 leu2Δ0 met15Δ0 NUP57-GFP::HIS3</i>                        | Invitrogen              |
| <i>JSy065</i>     | <i>his3 ura3Δ0 leu2Δ0 NUP1-GFP::HIS3 apq12::KAN<sup>R</sup></i>                 | This study              |
| <i>JSy066</i>     | <i>his3 ura3Δ0 leu2Δ0 NUP60-GFP::HIS3 apq12::KAN<sup>R</sup></i>                | This study              |
| <i>JSy067</i>     | <i>his3 ura3Δ0 leu2Δ0 NUP170-GFP::HIS3 apq12::KAN<sup>R</sup></i>               | This study              |
| <i>JSy068</i>     | <i>his3 ura3Δ0 leu2Δ0 NUP188-GFP::HIS3 apq12::KAN<sup>R</sup></i>               | This study              |
| <i>JSy048</i>     | <i>his3 ura3 leu2 rip1::HIS3 apq12::KAN<sup>R</sup> pRIP1-GFP</i>               | This study              |
| <i>JSy071</i>     | <i>his3 ura3Δ0 leu2Δ0 NUP57-GFP::HIS3 apq12::KAN<sup>R</sup></i>                | This study              |
| <i>JSy072</i>     | <i>his3 ura3Δ0 leu2Δ0 SAC3-GFP::HIS3 apq12::KAN<sup>R</sup></i>                 | This study              |
| <i>JSy073</i>     | <i>his3 ura3Δ0 leu2Δ0 MLP1-GFP::HIS3 apq12::KAN<sup>R</sup></i>                 | This study              |
| <i>JSy077</i>     | <i>his3 ura3Δ0 leu2Δ0 NSP1-GFP::HIS3 apq12::KAN<sup>R</sup></i>                 | This study              |
| <i>CSy513</i>     | <i>MATa trp1Δ63 ura3-52 leu2Δ1 rat8/dbp5::HIS3 pRat8.31</i>                     | Snay-Hodge et al., 1998 |
| <i>CSy1052</i>    | <i>ura3 leu2 apq12::KAN<sup>R</sup> rat8/dbp5::HIS3 pRat8.31 (YCplac33RAT8)</i> | This study              |
| <i>YDPy111</i>    | <i>MATa gle1::HIS3 ura3-52 leu2Δ1 his3Δ200 trp1Δ63 (pVDP9: YCpLac33-GLE1)</i>   | Del Priore et al., 1996 |
| <i>CSy1054</i>    | <i>ura3 leu2 apq12::KAN<sup>R</sup> gle1::HIS3 pVDP9</i>                        | This study              |
| <i>2709</i>       | <i>MATa ndc1::KanMX + pALR10-NDC1</i>                                           | Lau et al., 2004        |
| <i>JSy084</i>     | <i>apq12::KAN<sup>R</sup> ndc1::KanMX + pALR10-NDC1</i>                         | This study              |
| <i>JSy085</i>     | <i>GAL10-GFP-S65T-nup49-URA3</i>                                                | This study              |
| <i>JSy086</i>     | <i>GAL10-GFP-S65T-nup49-URA3 apq12::KAN<sup>R</sup></i>                         | This study              |
| <i>SWY27</i>      | <i>MATa ade2-1 ura3-1 his3-11,15 trp1-1 leu2-3,112 can1-100 nup116-5::HIS3</i>  | Wente and Blobel, 1993  |

|                 |                                                                                                         |                         |
|-----------------|---------------------------------------------------------------------------------------------------------|-------------------------|
| JSy090          | <i>apq12::KAN<sup>R</sup> nup116-5::HIS3</i>                                                            | This study              |
| JSy096          | <i>SEC63-RFP::HIS3 NUP82-GFP::HIS3 apq12::KAN<sup>R</sup></i>                                           | This study              |
| JSy101          | <i>NUP188-RFP::KAN<sup>R</sup> NUP82-GFP::HIS3 apq12::KAN<sup>R</sup></i>                               | This study              |
| RSy281          | <i>MATα sec23-1 ura3-52 his4-619</i>                                                                    | C. Barlowe <sup>b</sup> |
| <i>erv25Δ</i>   | <i>MATα his3Δ leu2Δ0 ura3Δ0 lys2Δ0 erv25::KAN<sup>R</sup></i>                                           | Research Genetics       |
| SWY2515         | <i>MATα trp1-1 ura3-1 his3-11,15 leu2-3,112 can1-100 NIC96-GFP::HIS3 NUP170-GFP::URA3 prp20 (G282S)</i> | Ryan et al., 2003       |
| YRX12           | <i>MATα ura3-52 his3Δ200 leu2Δ1 lys2-801 acc1-7-1</i>                                                   | Schneiter et al., 1996  |
| JSy102          | <i>ura3-52 his3 leu2 apq12::KAN<sup>R</sup> mtr7-1(acc1)</i>                                            | This study              |
| Name            | Description                                                                                             | Source                  |
| <b>Plasmids</b> |                                                                                                         |                         |
| pFS1030         | <i>GLE1-GFP, LEU2, CEN</i>                                                                              | Strahm et al., 1999     |
| pCS835          | <i>RAT8-GFP</i> in YCplac111                                                                            | Snay-Hodge et al., 1998 |
| pMex67-GFP      | pUN100- <i>LEU2-MEX67-GFP</i>                                                                           | Segref et al., 1997     |
| pCSNup49-GFP-1  | <i>GFP-NUP49</i> in YIplac211                                                                           | This study              |
| pRip1-GFP       | <i>RIP1-GFP, LEU2, 2μm</i>                                                                              | F. Stutz <sup>c</sup>   |
|                 | pRS314- <i>ndc1-39-3xmyc</i>                                                                            | Lau et al., 2004        |
|                 | pRS315- <i>NDC1-GFP</i>                                                                                 | Chial et al., 1998      |
| pALR-10         | <i>pNDC1, URA3, CEN</i>                                                                                 | Chial et al., 1998      |
| pJK59           | <i>pSEC63-GFP, URA3, CEN</i>                                                                            | Prinz et al., 2000      |
| CBB1794         | <i>p4xUPRE-GFP URA3</i>                                                                                 | Wilson et al., 2006     |
| Yip-Nupp116-GFP | <i>Nup116-GFP</i> in YIplac211                                                                          | Izawa et al., 2004      |

<sup>a</sup>Harvard Medical School, Boston, MA.

<sup>b</sup>Dartmouth Medical School, Hanover, NH.

<sup>c</sup>Department of Cell Biology, University of Geneva, Geneva, Switzerland.

#### References

- Chial, H.J., M.P. Rout, T.H. Giddings, and M. Winey. 1998. *Saccharomyces cerevisiae* Ndc1p is a shared component of nuclear pore complexes and spindle pole bodies. *J. Cell Biol.* 143:1789–1800.
- Del Priore, V., C.A. Snay, A. Bahr, and C.N. Cole. 1996. The product of the *Saccharomyces cerevisiae* RSS1 gene, identified as a high-copy suppressor of the rat7-1 temperature-sensitive allele of the RAT7/NUP159 nucleoporin, is required for efficient mRNA export. *Mol. Biol. Cell.* 7:1601–1621.
- Goldstein, A.L., C.A. Snay, C.V. Heath, and C.N. Cole. 1996. Pleiotropic nuclear defects associated with a conditional allele of the novel nucleoporin Rat9p/Nup85p. *Mol. Biol. Cell.* 7:917–934.
- Heath, C., C. Copeland, D. Amberg, V. Del Priore, M. Snyder, and C. Cole. 1995. Nuclear pore complex clustering and nuclear accumulation of poly(A)<sup>+</sup> RNA associated with mutation of the *Saccharomyces cerevisiae* RAT2/NUP120 gene. *J. Cell Biol.* 131:1677–1697.
- Hodge, C.A., H.V. Colot, P. Stafford, and C.N. Cole. 1999. Rat8p/Dbp5p is a shuttling transport factor that interacts with Rat7p/Nup159p and Gle1p and suppresses the mRNA export defect of xpo1-1 cells. *EMBO J.* 18:5778–5788.
- Izawa, S., R. Takemura, and Y. Inoue. 2004. Gle2p is essential to induce adaptation of the export of Bulk poly(A)<sup>+</sup> mRNA to heat shock in *Saccharomyces cerevisiae*. *J. Biol. Chem.* 279:35469–35478.
- Lau, C.K., T.H. Giddings Jr., and M. Winey. 2004. A novel allele of *Saccharomyces cerevisiae* NDC1 reveals a potential role for the spindle pole body component Ndc1p in nuclear pore assembly. *Eukaryot. Cell.* 3:447–458.
- Prinz, W.A., L. Grzyb, M. Veenhuis, J.A. Kahana, P.A. Silver, and T.A. Rapoport. 2000. Mutants affecting the structure of the cortical endoplasmic reticulum in *Saccharomyces cerevisiae*. *J. Cell Biol.* 150:461–474.
- Ryan, K.J., J.M. McCaffery, and S.R. Wentle. 2003. The Ran GTPase cycle is required for yeast nuclear pore complex assembly. *J. Cell Biol.* 160:1041–1053.
- Saavedra, C.A., C.M. Hammell, C.V. Heath, and C.N. Cole. 1997. Yeast heat shock mRNAs are exported through a distinct pathway defined by Rip1p. *Genes Dev.* 11:2845–2856.
- Schneiter, R., M. Hitomi, A. Ivessa, E. Fasch, S. Kohlwein, and A. Tartakoff. 1996. A yeast acetyl coenzyme A carboxylase mutant links very-long-chain fatty acid synthesis to the structure and function of the nuclear membrane-pore complex. *Mol. Cell Biol.* 16:7161–7172.
- Segref, A., K. Sharma, V. Doye, A. Hellwig, J. Huber, R. Luhrmann, and E. Hurt. 1997. Mex67p, a novel factor for nuclear mRNA export, binds to both poly(A)<sup>+</sup> RNA and nuclear pores. *EMBO J.* 16:3256–3271.
- Snay-Hodge, C.A., H.V. Colot, A.L. Goldstein, and C.N. Cole. 1998. Dbp5p/Rat8p is a yeast nuclear pore-associated DEAD-box protein essential for RNA export. *EMBO J.* 17:2663–2676.
- Strahm, Y., B. Fahrenkrog, D. Zenklusen, E. Rychner, J. Kantor, M. Rosbach, and F. Stutz. 1999. The RNA export factor Gle1p is located on the cytoplasmic fibrils of the NPC and physically interacts with the FG-nucleoporin Rip1p, the DEAD-box protein Rat8p/Dbp5p and a new protein Ymr 255p. *EMBO J.* 18:5761–5777.
- Wentle, S.R., and G. Blobel. 1993. A temperature-sensitive NUP116 null mutant forms a nuclear envelope seal over the yeast nuclear pore complex thereby blocking nucleocytoplasmic traffic. *J. Cell Biol.* 123:275–284.
- Wilson, J.D., Y. Liu, C. Bentivoglio, and C. Barlowe. 2006. Sel1p/Ubx2p participates in a distinct Cdc48-dependent endoplasmic reticulum-associated degradation pathway. *Traffic.* 7:1213–1223.
